# Supplementary material for: Functional characterization of a terpene synthase responsible for (E)-β-ocimene biosynthesis identified in Pyrus betuleafolia transcriptome after herbivory
Source: Front Plant Sci. 2022 Nov 21;13:1077229. doi: 10.3389/fpls.2022.1077229 (PMC9720175; doi:10.3389/fpls.2022.1077229)
Supplement: Supplementary file 4 [file Table_4.xlsx]

## Sheet: 1
Table S4. Differentially expressed genes (DEGs) associated with phytohormone pathways in Pyrus betuleafolia leaves after Spodoptera litura infestation.
id	log2(fc)	PValue	FDR	Symbol	Description	KEGG_A_class	KEGG_B_class	Pathway	K_ID	GO Component	GO Function	GO Process
JA
GWHGAAYT003242	8.49185	0.00711165	0.0444	AOS3	PREDICTED: allene oxide synthase-like [Pyrus x bretschneideri]	Metabolism;Metabolism;Metabolism	Global and overview maps;Global and overview maps;Lipid metabolism	ko01100//Metabolic pathways;ko01110//Biosynthesis of secondary metabolites;ko00592//alpha-Linolenic acid metabolism	K01723;K01723;K01723	-	GO:0016491//oxidoreductase activity;GO:0046906//tetrapyrrole binding;GO:0046914//transition metal ion binding	GO:0044710//single-organism metabolic process
GWHGAAYT018276	4.91211	2.54686e-07	5.69271e-06	MYC3	PREDICTED: transcription factor MYC2-like [Pyrus x bretschneideri]	-	-	-	-	-	-	-
GWHGAAYT034024	4.06559	0.000225003	0.00245736	LOX2.1	PREDICTED: linoleate 13S-lipoxygenase 2-1, chloroplastic-like [Pyrus x bretschneideri]	Metabolism;Metabolism;Metabolism;Metabolism	Global and overview maps;Global and overview maps;Lipid metabolism;Lipid metabolism	ko01100//Metabolic pathways;ko01110//Biosynthesis of secondary metabolites;ko00592//alpha-Linolenic acid metabolism;ko00591//Linoleic acid metabolism	K00454;K00454;K00454;K00454	-	-	-
GWHGAAYT055066	3.77769	1.24858e-25	1.86528e-23	TIFY10C	PREDICTED: protein TIFY 6b-like [Malus domestica]	Environmental Information Processing	Signal transduction	ko04075//Plant hormone signal transduction	K13464	-	-	-
GWHGAAYT054129	3.64859	0.00247512	0.0186356	AOC	PREDICTED: allene oxide cyclase 4, chloroplastic-like [Pyrus x bretschneideri]	Metabolism;Metabolism;Metabolism	Global and overview maps;Global and overview maps;Lipid metabolism	ko01100//Metabolic pathways;ko01110//Biosynthesis of secondary metabolites;ko00592//alpha-Linolenic acid metabolism	K10525;K10525;K10525	GO:0009536//plastid	GO:0003824//catalytic activity	-
GWHGAAYT025591	3.33299	3.59445e-10	1.28196e-08	TIFY9	PREDICTED: protein TIFY 9-like [Pyrus x bretschneideri]	Environmental Information Processing	Signal transduction	ko04075//Plant hormone signal transduction	K13464	-	-	GO:0009725//response to hormone;GO:0044763//single-organism cellular process;GO:0050794//regulation of cellular process
GWHGAAYT014151	3.25534	1.68751e-08	4.61795e-07	TIFY9	PREDICTED: protein TIFY 9 [Pyrus x bretschneideri]	Environmental Information Processing	Signal transduction	ko04075//Plant hormone signal transduction	K13464	-	-	GO:0001101//response to acid chemical;GO:0007165//signal transduction;GO:0009725//response to hormone;GO:1901700//response to oxygen-containing compound
GWHGAAYT024850	3.1507	3.41096e-09	1.04473e-07	AOC	PREDICTED: allene oxide cyclase 4, chloroplastic-like [Pyrus x bretschneideri]	Metabolism;Metabolism;Metabolism	Global and overview maps;Global and overview maps;Lipid metabolism	ko01100//Metabolic pathways;ko01110//Biosynthesis of secondary metabolites;ko00592//alpha-Linolenic acid metabolism	K10525;K10525;K10525	GO:0009536//plastid	GO:0009975//cyclase activity	-
GWHGAAYT057272	2.91833	0.00116799	0.00995632	TIFY10B	PREDICTED: protein TIFY 10B-like [Pyrus x bretschneideri]	Environmental Information Processing	Signal transduction	ko04075//Plant hormone signal transduction	K13464	-	-	-
GWHGAAYT059086	2.91833	0.00116799	0.00995632	TIFY10B	PREDICTED: protein TIFY 10B-like [Pyrus x bretschneideri]	Environmental Information Processing	Signal transduction	ko04075//Plant hormone signal transduction	K13464	-	-	-
GWHGAAYT044990	2.34869	2.06147e-06	3.80592e-05	At4g16820	PREDICTED: phospholipase A1-Ibeta2, chloroplastic-like [Pyrus x bretschneideri]	-	-	-	-	GO:0009536//plastid	GO:0004620//phospholipase activity	GO:0006629//lipid metabolic process;GO:0009692//ethylene metabolic process
GWHGAAYT024605	2.26157	3.29897e-07	7.19392e-06	TIFY6B	PREDICTED: protein TIFY 6A-like isoform X1 [Pyrus x bretschneideri]	Environmental Information Processing	Signal transduction	ko04075//Plant hormone signal transduction	K13464	-	-	-
GWHGAAYT034025	2.21251	2.15593e-08	5.80753e-07	LOX2.1	PREDICTED: linoleate 13S-lipoxygenase 2-1, chloroplastic-like [Pyrus x bretschneideri]	Metabolism;Metabolism;Metabolism;Metabolism	Global and overview maps;Global and overview maps;Lipid metabolism;Lipid metabolism	ko01100//Metabolic pathways;ko01110//Biosynthesis of secondary metabolites;ko00592//alpha-Linolenic acid metabolism;ko00591//Linoleic acid metabolism	K00454;K00454;K00454;K00454	-	-	-
GWHGAAYT043588	2.21205	0.00107017	0.00925449	At1g06800	PREDICTED: phospholipase A1-Igamma1, chloroplastic-like [Pyrus x bretschneideri]	-	-	-	-	-	GO:0003824//catalytic activity	-
GWHGAAYT031844	2.1614	5.49775e-10	1.89611e-08	TIFY10A	PREDICTED: protein TIFY 10A [Pyrus x bretschneideri]	Environmental Information Processing	Signal transduction	ko04075//Plant hormone signal transduction	K13464	-	-	-
GWHGAAYT021521	2.1331	3.98355e-07	8.52648e-06	TIFY10A	PREDICTED: protein TIFY 10A-like [Pyrus x bretschneideri]	Environmental Information Processing	Signal transduction	ko04075//Plant hormone signal transduction	K13464	-	-	-
GWHGAAYT047244	1.96126	0.000415502	0.00415577	LOX2.1	PREDICTED: linoleate 13S-lipoxygenase 2-1, chloroplastic-like [Pyrus x bretschneideri]	Metabolism;Metabolism;Metabolism;Metabolism	Global and overview maps;Global and overview maps;Lipid metabolism;Lipid metabolism	ko01100//Metabolic pathways;ko01110//Biosynthesis of secondary metabolites;ko00592//alpha-Linolenic acid metabolism;ko00591//Linoleic acid metabolism	K00454;K00454;K00454;K00454	-	-	-
GWHGAAYT031790	1.9351	4.07186e-08	1.04038e-06	OPR3	PREDICTED: 12-oxophytodienoate reductase 3 [Pyrus x bretschneideri]	Metabolism;Metabolism;Metabolism	Global and overview maps;Global and overview maps;Lipid metabolism	ko01100//Metabolic pathways;ko01110//Biosynthesis of secondary metabolites;ko00592//alpha-Linolenic acid metabolism	K05894;K05894;K05894	-	GO:0003824//catalytic activity;GO:0032553//ribonucleotide binding	GO:0044710//single-organism metabolic process
GWHGAAYT021479	1.90828	1.00679e-11	4.32892e-10	OPR3	PREDICTED: 12-oxophytodienoate reductase 3 [Malus domestica]	Metabolism;Metabolism;Metabolism	Global and overview maps;Global and overview maps;Lipid metabolism	ko01100//Metabolic pathways;ko01110//Biosynthesis of secondary metabolites;ko00592//alpha-Linolenic acid metabolism	K05894;K05894;K05894	-	GO:0003824//catalytic activity;GO:0032553//ribonucleotide binding	GO:0044710//single-organism metabolic process
GWHGAAYT000901	1.85697	0.000235638	0.00255545	MYC2	PREDICTED: transcription factor bHLH14-like [Malus domestica]	Environmental Information Processing;Environmental Information Processing	Signal transduction;Signal transduction	ko04075//Plant hormone signal transduction;ko04016//MAPK signaling pathway - plant	K13422;K13422	-	-	-
GWHGAAYT050963	1.80966	6.74792e-07	1.37786e-05	AOS1	PREDICTED: allene oxide synthase 1, chloroplastic-like [Pyrus x bretschneideri]	Metabolism;Metabolism;Metabolism	Global and overview maps;Global and overview maps;Lipid metabolism	ko01100//Metabolic pathways;ko01110//Biosynthesis of secondary metabolites;ko00592//alpha-Linolenic acid metabolism	K01723;K01723;K01723	-	GO:0016491//oxidoreductase activity;GO:0046906//tetrapyrrole binding;GO:0046914//transition metal ion binding	GO:0044710//single-organism metabolic process
GWHGAAYT031914	1.56373	1.20441e-06	2.34017e-05	TIFY3B	PREDICTED: protein TIFY 3B-like [Pyrus x bretschneideri]	Environmental Information Processing	Signal transduction	ko04075//Plant hormone signal transduction	K13464	-	-	-
GWHGAAYT052978	1.5488	0.000941072	0.00832574	OPR2	PREDICTED: 12-oxophytodienoate reductase 2-like [Pyrus x bretschneideri]	Metabolism;Metabolism;Metabolism	Global and overview maps;Global and overview maps;Lipid metabolism	ko01100//Metabolic pathways;ko01110//Biosynthesis of secondary metabolites;ko00592//alpha-Linolenic acid metabolism	K05894;K05894;K05894	-	GO:0003824//catalytic activity;GO:0032553//ribonucleotide binding	GO:0044710//single-organism metabolic process
GWHGAAYT044763	1.51643	5.74828e-15	3.54348e-13	MYC2	transcription factor MYC2 [Malus domestica]	Environmental Information Processing;Environmental Information Processing	Signal transduction;Signal transduction	ko04075//Plant hormone signal transduction;ko04016//MAPK signaling pathway - plant	K13422;K13422	-	GO:0005515//protein binding;GO:0016628//oxidoreductase activity, acting on the CH-CH group of donors, NAD or NADP as acceptor	GO:0044710//single-organism metabolic process
GWHGAAYT001489	1.3808	1.38079e-07	3.23188e-06	PLC2	PREDICTED: phosphoinositide phospholipase C 2-like [Pyrus x bretschneideri]	Metabolism;Metabolism;Environmental Information Processing	Global and overview maps;Carbohydrate metabolism;Signal transduction	ko01100//Metabolic pathways;ko00562//Inositol phosphate metabolism;ko04070//Phosphatidylinositol signaling system	K05857;K05857;K05857	-	GO:0042578//phosphoric ester hydrolase activity;GO:0060089//molecular transducer activity	GO:0006629//lipid metabolic process;GO:0007165//signal transduction
GWHGAAYT001488	1.23826	1.11667e-05	0.000174572	PLC6	PREDICTED: phosphoinositide phospholipase C 6-like [Pyrus x bretschneideri]	Metabolism;Metabolism;Environmental Information Processing	Global and overview maps;Carbohydrate metabolism;Signal transduction	ko01100//Metabolic pathways;ko00562//Inositol phosphate metabolism;ko04070//Phosphatidylinositol signaling system	K05857;K05857;K05857	-	GO:0016787//hydrolase activity	GO:0006629//lipid metabolic process;GO:0007165//signal transduction
GWHGAAYT027393	1.16009	9.04216e-09	2.57803e-07	MYC2	PREDICTED: transcription factor MYC2 [Pyrus x bretschneideri]	Environmental Information Processing;Environmental Information Processing	Signal transduction;Signal transduction	ko04075//Plant hormone signal transduction;ko04016//MAPK signaling pathway - plant	K13422;K13422	-	GO:0005515//protein binding	-
GWHGAAYT014026	1.1586	2.2317e-10	8.24042e-09	LOX6	lipoxygenase [Malus domestica]	Metabolism;Metabolism;Metabolism;Metabolism	Global and overview maps;Global and overview maps;Lipid metabolism;Lipid metabolism	ko01100//Metabolic pathways;ko01110//Biosynthesis of secondary metabolites;ko00592//alpha-Linolenic acid metabolism;ko00591//Linoleic acid metabolism	K00454;K00454;K00454;K00454	GO:0009536//plastid;GO:0016020//membrane	GO:0016702//oxidoreductase activity, acting on single donors with incorporation of molecular oxygen, incorporation of two atoms of oxygen;GO:0043169//cation binding	GO:0006633//fatty acid biosynthetic process;GO:0006950//response to stress;GO:0009694//jasmonic acid metabolic process;GO:0055114//oxidation-reduction process
GWHGAAYT019500	1.13821	1.1909e-05	0.000185286	4CLL5	PREDICTED: 4-coumarate--CoA ligase-like 5 [Pyrus x bretschneideri]	Metabolism;Metabolism;Metabolism	Global and overview maps;Global and overview maps;Lipid metabolism	ko01100//Metabolic pathways;ko01110//Biosynthesis of secondary metabolites;ko00592//alpha-Linolenic acid metabolism	K10526;K10526;K10526	GO:0042579//microbody	GO:0003824//catalytic activity;GO:0032550//purine ribonucleoside binding	GO:0001101//response to acid chemical;GO:0009694//jasmonic acid metabolic process;GO:0010243//response to organonitrogen compound;GO:0051707//response to other organism
GWHGAAYT040342	-1.01749	0.000156139	0.00179643	LCAT3	PREDICTED: phospholipase A(1) LCAT3 [Pyrus x bretschneideri]	Metabolism;Metabolism;Metabolism;Metabolism	Global and overview maps;Global and overview maps;Lipid metabolism;Lipid metabolism	ko01100//Metabolic pathways;ko01110//Biosynthesis of secondary metabolites;ko00564//Glycerophospholipid metabolism;ko00592//alpha-Linolenic acid metabolism	K22389;K22389;K22389;K22389	GO:0016020//membrane;GO:0043227//membrane-bounded organelle	GO:0004620//phospholipase activity;GO:0016747//transferase activity, transferring acyl groups other than amino-acyl groups	GO:0006629//lipid metabolic process
GWHGAAYT019674	-1.29267	0.000904443	0.0080471	JMT	PREDICTED: jasmonate O-methyltransferase-like [Pyrus x bretschneideri]	Metabolism;Metabolism	Global and overview maps;Lipid metabolism	ko01110//Biosynthesis of secondary metabolites;ko00592//alpha-Linolenic acid metabolism	K08241;K08241	-	GO:0003824//catalytic activity	GO:0008152//metabolic process
GWHGAAYT024013	-3.5251	1.51993e-22	1.85438e-20	OPR2	PREDICTED: 12-oxophytodienoate reductase 2-like [Malus domestica]	Metabolism;Metabolism;Metabolism	Global and overview maps;Global and overview maps;Lipid metabolism	ko01100//Metabolic pathways;ko01110//Biosynthesis of secondary metabolites;ko00592//alpha-Linolenic acid metabolism	K05894;K05894;K05894	-	-	-
SA
GWHGAAYT040138	2.31253	1.80654e-06	3.3714e-05	HEL	PREDICTED: pathogenesis-related protein PR-4 [Malus domestica]	-	-	-	-	-	-	GO:0009620//response to fungus
GWHGAAYT029213	1.26074	0.00049353	0.00482667	NPR2	PREDICTED: BTB/POZ domain and ankyrin repeat-containing protein NPR2-like [Pyrus x bretschneideri]	Environmental Information Processing	Signal transduction	ko04075//Plant hormone signal transduction	K14508	-	-	-
GWHGAAYT011340	-1.54998	2.60605e-06	4.71909e-05	PAL1	phenylalanine ammonia-lyase 1 [Pyrus x bretschneideri]	Metabolism;Metabolism;Metabolism;Metabolism	Global and overview maps;Global and overview maps;Biosynthesis of other secondary metabolites;Amino acid metabolism	ko01100//Metabolic pathways;ko01110//Biosynthesis of secondary metabolites;ko00940//Phenylpropanoid biosynthesis;ko00360//Phenylalanine metabolism	K10775;K10775;K10775;K10775	-	-	-
GWHGAAYT038899	-2.00359	1.22943e-05	0.000190673	PAL1	phenylalanine ammonia-lyase 1 precursor [Pyrus x bretschneideri]	Metabolism;Metabolism;Metabolism;Metabolism	Global and overview maps;Global and overview maps;Biosynthesis of other secondary metabolites;Amino acid metabolism	ko01100//Metabolic pathways;ko01110//Biosynthesis of secondary metabolites;ko00940//Phenylpropanoid biosynthesis;ko00360//Phenylalanine metabolism	K10775;K10775;K10775;K10775	-	-	-
GWHGAAYT015590	-2.32569	0.00342885	0.0243808	PR-1	PREDICTED: pathogenesis-related protein PR-1-like [Malus domestica]	-	-	-	-	-	-	-
GWHGAAYT003047	-2.50587	2.77804e-06	5.00269e-05	SAMT	PREDICTED: salicylate carboxymethyltransferase-like [Pyrus x bretschneideri]	-	-	-	-	-	-	-
GWHGAAYT015594	-4.35908	3.28192e-07	7.16614e-06	PR-1	PREDICTED: pathogenesis-related protein PR-1-like [Malus domestica]	-	-	-	-	-	-	-
GWHGAAYT003042	-4.64804	5.87858e-07	1.21733e-05	SAMT	PREDICTED: salicylate carboxymethyltransferase-like [Pyrus x bretschneideri]	-	-	-	-	-	-	-
ET
GWHGAAYT005906	4.17309	5.22543e-12	2.31827e-10	ACO2	1-aminocyclopropane-1-carboxylate oxidase 1 [Pyrus x bretschneideri]	Metabolism;Metabolism;Metabolism	Global and overview maps;Global and overview maps;Amino acid metabolism	ko01100//Metabolic pathways;ko01110//Biosynthesis of secondary metabolites;ko00270//Cysteine and methionine metabolism	K05933;K05933;K05933	-	-	-
GWHGAAYT045618	3.53343	0.00451552	0.0306772	ACS1	PREDICTED: 1-aminocyclopropane-1-carboxylate synthase-like [Pyrus x bretschneideri]	Metabolism;Metabolism;Environmental Information Processing;Metabolism	Global and overview maps;Global and overview maps;Signal transduction;Amino acid metabolism	ko01100//Metabolic pathways;ko01110//Biosynthesis of secondary metabolites;ko04016//MAPK signaling pathway - plant;ko00270//Cysteine and methionine metabolism	K20772;K20772;K20772;K20772	-	GO:0043168//anion binding	GO:0008152//metabolic process
GWHGAAYT010125	3.45651	5.72595e-05	0.000745494	At1g06620	PREDICTED: 1-aminocyclopropane-1-carboxylate oxidase homolog 4-like [Pyrus x bretschneideri]	-	-	-	-	-	GO:0016706//oxidoreductase activity, acting on paired donors, with incorporation or reduction of molecular oxygen, 2-oxoglutarate as one donor, and incorporation of one atom each of oxygen into both donors;GO:0043169//cation binding	GO:0044710//single-organism metabolic process
GWHGAAYT015116	2.7937	1.46458e-07	3.41707e-06	ERF1B	PREDICTED: ethylene-responsive transcription factor 1B-like [Pyrus x bretschneideri]	Environmental Information Processing;Environmental Information Processing	Signal transduction;Signal transduction	ko04075//Plant hormone signal transduction;ko04016//MAPK signaling pathway - plant	K14516;K14516	GO:0043231//intracellular membrane-bounded organelle	GO:0001071//nucleic acid binding transcription factor activity	GO:0010468//regulation of gene expression;GO:0034645//cellular macromolecule biosynthetic process
GWHGAAYT045012	2.60264	3.54496e-10	1.26585e-08	ERF1A	PREDICTED: ethylene-responsive transcription factor 2-like [Pyrus x bretschneideri]	-	-	-	-	-	-	GO:0010467//gene expression;GO:0034645//cellular macromolecule biosynthetic process
GWHGAAYT038153	2.13035	4.29996e-07	9.15687e-06	ERF1A	PREDICTED: ethylene-responsive transcription factor 2-like [Pyrus x bretschneideri]	-	-	-	-	-	-	GO:0010467//gene expression;GO:0034645//cellular macromolecule biosynthetic process
GWHGAAYT042948	1.92961	7.08876e-06	0.000116741	At1g06620	PREDICTED: 1-aminocyclopropane-1-carboxylate oxidase homolog 1-like [Pyrus x bretschneideri]	-	-	-	-	-	-	-
GWHGAAYT033679	1.86756	1.84733e-14	1.0669e-12	EIN3	EIL [Pyrus x bretschneideri]	Environmental Information Processing;Environmental Information Processing	Signal transduction;Signal transduction	ko04075//Plant hormone signal transduction;ko04016//MAPK signaling pathway - plant	K14514;K14514	-	-	-
GWHGAAYT015094	1.42055	0.00540458	0.0356022	At1g06620	PREDICTED: 1-aminocyclopropane-1-carboxylate oxidase homolog 1-like [Pyrus x bretschneideri]	-	-	-	-	-	-	-
GWHGAAYT047635	1.11103	1.66281e-07	3.84587e-06	EIN3	PREDICTED: ETHYLENE INSENSITIVE 3-like 1 protein [Pyrus x bretschneideri]	Environmental Information Processing;Environmental Information Processing	Signal transduction;Signal transduction	ko04075//Plant hormone signal transduction;ko04016//MAPK signaling pathway - plant	K14514;K14514	-	-	-
GWHGAAYT026458	-1.15643	0.000330561	0.0034214	ETR2	PREDICTED: ethylene receptor 2-like [Pyrus x bretschneideri]	Environmental Information Processing;Environmental Information Processing	Signal transduction;Signal transduction	ko04075//Plant hormone signal transduction;ko04016//MAPK signaling pathway - plant	K14509;K14509	GO:0031090//organelle membrane	GO:0004672//protein kinase activity;GO:0060089//molecular transducer activity	GO:0000160//phosphorelay signal transduction system;GO:0006468//protein phosphorylation
GWHGAAYT031346	-1.90732	7.88962e-18	6.48922e-16	EBF2	PREDICTED: EIN3-binding F-box protein 1-like [Pyrus x bretschneideri]	Environmental Information Processing;Environmental Information Processing	Signal transduction;Signal transduction	ko04075//Plant hormone signal transduction;ko04016//MAPK signaling pathway - plant	K14515;K14515	-	-	-
ABA
GWHGAAYT027649	3.02438	3.22634e-10	1.15795e-08	CYP707A1	PREDICTED: abscisic acid 8'-hydroxylase 1-like [Pyrus x bretschneideri]	Metabolism	Metabolism of terpenoids and polyketides	ko00906//Carotenoid biosynthesis	K09843	-	GO:0016491//oxidoreductase activity;GO:0046906//tetrapyrrole binding;GO:0046914//transition metal ion binding	GO:0044710//single-organism metabolic process
GWHGAAYT056248	2.88613	0.00191756	0.0150814	CAR4	PREDICTED: protein C2-DOMAIN ABA-RELATED 4-like [Pyrus x bretschneideri]	-	-	-	-	-	-	-
GWHGAAYT049726	2.59703	1.38993e-05	0.000211751	At2g30020	PREDICTED: probable protein phosphatase 2C 25 [Pyrus x bretschneideri]	-	-	-	-	-	GO:0004721//phosphoprotein phosphatase activity	GO:0009791//post-embryonic development;GO:0044763//single-organism cellular process;GO:0048856//anatomical structure development;GO:0050896//response to stimulus
GWHGAAYT002140	1.65473	0.00146298	0.0120279	PP2C51	PREDICTED: probable protein phosphatase 2C 51 [Pyrus x bretschneideri]	Environmental Information Processing;Environmental Information Processing	Signal transduction;Signal transduction	ko04075//Plant hormone signal transduction;ko04016//MAPK signaling pathway - plant	K14497;K14497	-	GO:0016787//hydrolase activity	-
GWHGAAYT002562	1.61552	0.00101775	0.00887179	GBF4	PREDICTED: G-box-binding factor 4-like isoform X1 [Pyrus x bretschneideri]	Environmental Information Processing	Signal transduction	ko04075//Plant hormone signal transduction	K14432	-	-	-
GWHGAAYT039882	1.58496	5.6843e-05	0.000740729	At3g05640	PREDICTED: probable protein phosphatase 2C 34 [Pyrus x bretschneideri]	-	-	-	-	-	GO:0016791//phosphatase activity	GO:0006796//phosphate-containing compound metabolic process
GWHGAAYT032528	1.54197	6.39486e-13	3.13123e-11	SRK2I	PREDICTED: serine/threonine-protein kinase SRK2I-like [Pyrus x bretschneideri]	Environmental Information Processing;Environmental Information Processing	Signal transduction;Signal transduction	ko04075//Plant hormone signal transduction;ko04016//MAPK signaling pathway - plant	K14498;K14498	GO:0043231//intracellular membrane-bounded organelle;GO:0044444//cytoplasmic part	GO:0004674//protein serine/threonine kinase activity;GO:0019902//phosphatase binding;GO:0032550//purine ribonucleoside binding	GO:0001101//response to acid chemical;GO:0005984//disaccharide metabolic process;GO:0006464//cellular protein modification process;GO:0006633//fatty acid biosynthetic process;GO:0006641//triglyceride metabolic process;GO:0006796//phosphate-containing compound metabolic process;GO:0006970//response to osmotic stress;GO:0009617//response to bacterium;GO:0009755//hormone-mediated signaling pathway;G…
GWHGAAYT044490	1.50497	0.000252489	0.00270415	CYP707A1	ABA 8'-hydroxylase 4 [Pyrus pyrifolia]	Metabolism	Metabolism of terpenoids and polyketides	ko00906//Carotenoid biosynthesis	K09843	-	GO:0016491//oxidoreductase activity;GO:0046906//tetrapyrrole binding;GO:0046914//transition metal ion binding	GO:0044710//single-organism metabolic process
GWHGAAYT022073	1.44824	7.51606e-10	2.54131e-08	SRK2I	PREDICTED: serine/threonine-protein kinase SRK2I [Pyrus x bretschneideri]	Environmental Information Processing;Environmental Information Processing	Signal transduction;Signal transduction	ko04075//Plant hormone signal transduction;ko04016//MAPK signaling pathway - plant	K14498;K14498	GO:0043231//intracellular membrane-bounded organelle;GO:0044444//cytoplasmic part	GO:0004674//protein serine/threonine kinase activity;GO:0019902//phosphatase binding;GO:0032550//purine ribonucleoside binding	GO:0001101//response to acid chemical;GO:0005984//disaccharide metabolic process;GO:0006464//cellular protein modification process;GO:0006633//fatty acid biosynthetic process;GO:0006641//triglyceride metabolic process;GO:0006796//phosphate-containing compound metabolic process;GO:0006970//response to osmotic stress;GO:0009617//response to bacterium;GO:0009755//hormone-mediated signaling pathway;G…
GWHGAAYT000808	1.21946	6.19291e-09	1.81667e-07	PYL3	PREDICTED: abscisic acid receptor PYL9 [Pyrus x bretschneideri]	Environmental Information Processing;Environmental Information Processing	Signal transduction;Signal transduction	ko04075//Plant hormone signal transduction;ko04016//MAPK signaling pathway - plant	K14496;K14496	-	-	-
GWHGAAYT041662	1.11551	2.61565e-05	0.000374052	At4g33920	PREDICTED: probable protein phosphatase 2C 63 [Pyrus x bretschneideri]	-	-	-	-	-	GO:0004721//phosphoprotein phosphatase activity;GO:0043169//cation binding	GO:0006464//cellular protein modification process
GWHGAAYT014333	-1.00572	2.72122e-07	6.04094e-06	Os05g0134200	PREDICTED: probable protein phosphatase 2C 47 isoform X1 [Pyrus x bretschneideri]	-	-	-	-	-	GO:0004721//phosphoprotein phosphatase activity;GO:0043169//cation binding	GO:0006464//cellular protein modification process
GWHGAAYT012291	-1.05718	2.59508e-05	0.00037139	At3g05640	PREDICTED: probable protein phosphatase 2C 34 [Malus domestica]	-	-	-	-	-	-	-
GWHGAAYT047066	-1.06139	9.50911e-07	1.89158e-05	CAR4	PREDICTED: protein C2-DOMAIN ABA-RELATED 4-like [Pyrus x bretschneideri]	-	-	-	-	-	-	-
GWHGAAYT023613	-1.09208	0.000477114	0.00469277	SAPK1	PREDICTED: serine/threonine-protein kinase SAPK1-like isoform X1 [Pyrus x bretschneideri]	Environmental Information Processing;Environmental Information Processing	Signal transduction;Signal transduction	ko04075//Plant hormone signal transduction;ko04016//MAPK signaling pathway - plant	K14498;K14498	-	-	-
GWHGAAYT021612	-1.09281	3.45584e-05	0.000479803	At3g51470	PREDICTED: probable protein phosphatase 2C 47 [Pyrus x bretschneideri]	-	-	-	-	-	GO:0004721//phosphoprotein phosphatase activity;GO:0043169//cation binding	GO:0006464//cellular protein modification process
GWHGAAYT051518	-1.15231	4.98546e-06	8.5851e-05	ABF2	PREDICTED: ABSCISIC ACID-INSENSITIVE 5-like protein 5 isoform X1 [Pyrus x bretschneideri]	Environmental Information Processing	Signal transduction	ko04075//Plant hormone signal transduction	K14432	-	-	-
GWHGAAYT026012	-1.17331	1.82045e-08	4.95856e-07	At3g16560	PREDICTED: probable protein phosphatase 2C 40 isoform X1 [Pyrus x bretschneideri]	-	-	-	-	-	-	-
GWHGAAYT001504	-1.17946	0.000304534	0.00318406	At2g30020	PREDICTED: probable protein phosphatase 2C 25 [Pyrus x bretschneideri]	-	-	-	-	GO:0043231//intracellular membrane-bounded organelle	GO:0004721//phosphoprotein phosphatase activity;GO:0043169//cation binding	GO:0003006//developmental process involved in reproduction;GO:0006464//cellular protein modification process;GO:0006950//response to stress;GO:0009755//hormone-mediated signaling pathway;GO:0010374//stomatal complex development
GWHGAAYT033894	-1.38383	0.00193126	0.0151525	ABA2	PREDICTED: xanthoxin dehydrogenase [Pyrus x bretschneideri]	Metabolism;Metabolism;Metabolism	Global and overview maps;Global and overview maps;Metabolism of terpenoids and polyketides	ko01100//Metabolic pathways;ko01110//Biosynthesis of secondary metabolites;ko00906//Carotenoid biosynthesis	K09841;K09841;K09841	-	GO:0003824//catalytic activity	GO:0044710//single-organism metabolic process
GWHGAAYT032015	-1.40701	4.97736e-06	8.5851e-05	At3g51470	PREDICTED: probable protein phosphatase 2C 47 isoform X1 [Pyrus x bretschneideri]	-	-	-	-	-	GO:0004721//phosphoprotein phosphatase activity;GO:0043169//cation binding	GO:0006464//cellular protein modification process
GWHGAAYT058256	-1.4156	4.28635e-13	2.14912e-11	SAPK2	Serine/threonine-protein kinase SAPK2 [Morus notabilis]	Environmental Information Processing;Environmental Information Processing	Signal transduction;Signal transduction	ko04075//Plant hormone signal transduction;ko04016//MAPK signaling pathway - plant	K14498;K14498	GO:0030529//intracellular ribonucleoprotein complex	GO:0004672//protein kinase activity;GO:0005198//structural molecule activity;GO:0032550//purine ribonucleoside binding	GO:0006464//cellular protein modification process;GO:0006796//phosphate-containing compound metabolic process;GO:0010467//gene expression
GWHGAAYT013174	-1.62242	1.56368e-08	4.30709e-07	CAR7	PREDICTED: protein C2-DOMAIN ABA-RELATED 7-like [Malus domestica]	-	-	-	-	-	-	-
GWHGAAYT025792	-1.78495	7.13437e-11	2.79654e-09	At1g48040	PREDICTED: probable protein phosphatase 2C 13 [Malus domestica]	-	-	-	-	-	-	-
GWHGAAYT022134	-2.15313	8.22775e-15	4.96736e-13	ABA2	PREDICTED: zeaxanthin epoxidase, chloroplastic [Pyrus x bretschneideri]	Metabolism;Metabolism;Metabolism	Global and overview maps;Global and overview maps;Metabolism of terpenoids and polyketides	ko01100//Metabolic pathways;ko01110//Biosynthesis of secondary metabolites;ko00906//Carotenoid biosynthesis	K09838;K09838;K09838	GO:0009536//plastid	GO:0016709//oxidoreductase activity, acting on paired donors, with incorporation or reduction of molecular oxygen, NAD(P)H as one donor, and incorporation of one atom of oxygen	GO:0009687//abscisic acid metabolic process
GWHGAAYT025288	-2.29278	0.00153602	0.0125561	CCD4	PREDICTED: probable carotenoid cleavage dioxygenase 4, chloroplastic [Malus domestica]	Metabolism;Metabolism;Metabolism	Global and overview maps;Global and overview maps;Metabolism of terpenoids and polyketides	ko01100//Metabolic pathways;ko01110//Biosynthesis of secondary metabolites;ko00906//Carotenoid biosynthesis	K09840;K09840;K09840	-	-	-
GWHGAAYT021432	-2.45943	0.000213884	0.00235603	PP2C53	PREDICTED: protein phosphatase 2C 77 [Malus domestica]	Environmental Information Processing;Environmental Information Processing	Signal transduction;Signal transduction	ko04075//Plant hormone signal transduction;ko04016//MAPK signaling pathway - plant	K14497;K14497	-	GO:0004721//phosphoprotein phosphatase activity	-
GWHGAAYT025254	-2.46274	4.63872e-17	3.57438e-15	CCD4	PREDICTED: probable carotenoid cleavage dioxygenase 4, chloroplastic [Malus domestica]	Metabolism;Metabolism;Metabolism	Global and overview maps;Global and overview maps;Metabolism of terpenoids and polyketides	ko01100//Metabolic pathways;ko01110//Biosynthesis of secondary metabolites;ko00906//Carotenoid biosynthesis	K09840;K09840;K09840	-	-	GO:0044710//single-organism metabolic process
GWHGAAYT043627	-2.54354	0.00654086	0.0414821	NCED3	9-cis-epoxycarotenoid dioxygenase [Malus prunifolia]	Metabolism;Metabolism;Metabolism	Global and overview maps;Global and overview maps;Metabolism of terpenoids and polyketides	ko01100//Metabolic pathways;ko01110//Biosynthesis of secondary metabolites;ko00906//Carotenoid biosynthesis	K09840;K09840;K09840	-	-	GO:0044710//single-organism metabolic process
GWHGAAYT005210	-2.74332	1.37975e-08	3.82219e-07	NCED3	9-cis-epoxycarotenoid dioxygenase 3 [Pyrus pyrifolia]	Metabolism;Metabolism;Metabolism	Global and overview maps;Global and overview maps;Metabolism of terpenoids and polyketides	ko01100//Metabolic pathways;ko01110//Biosynthesis of secondary metabolites;ko00906//Carotenoid biosynthesis	K09840;K09840;K09840	-	-	GO:0044710//single-organism metabolic process
GWHGAAYT032591	-3.0624	1.44446e-26	2.31122e-24	ABA2	PREDICTED: zeaxanthin epoxidase, chloroplastic-like [Pyrus x bretschneideri]	Metabolism;Metabolism;Metabolism	Global and overview maps;Global and overview maps;Metabolism of terpenoids and polyketides	ko01100//Metabolic pathways;ko01110//Biosynthesis of secondary metabolites;ko00906//Carotenoid biosynthesis	K09838;K09838;K09838	-	-	-
GWHGAAYT014534	-3.40187	3.73994e-07	8.06994e-06	At3g05640	PREDICTED: probable protein phosphatase 2C 34 [Pyrus x bretschneideri]	-	-	-	-	-	GO:0016791//phosphatase activity	GO:0006796//phosphate-containing compound metabolic process
GWHGAAYT014464	-3.98109	6.82799e-11	2.68363e-09	At3g05640	PREDICTED: probable protein phosphatase 2C 34 [Pyrus x bretschneideri]	-	-	-	-	-	GO:0016787//hydrolase activity	GO:0008152//metabolic process
AUXIN
GWHGAAYT011295	6.15987	8.97299e-05	0.00111471	SAUR72	PREDICTED: auxin-responsive protein SAUR40-like [Pyrus x bretschneideri]	Environmental Information Processing	Signal transduction	ko04075//Plant hormone signal transduction	K14488	-	-	-
GWHGAAYT025215	4.59648	2.41168e-08	6.43723e-07	ILL1	PREDICTED: IAA-amino acid hydrolase ILR1-like 1 isoform X1 [Malus domestica]	-	-	-	-	-	GO:0003824//catalytic activity	-
GWHGAAYT041617	4.01949	2.67272e-43	1.22281e-40	GH3.1	PREDICTED: probable indole-3-acetic acid-amido synthetase GH3.1 [Pyrus x bretschneideri]	Environmental Information Processing	Signal transduction	ko04075//Plant hormone signal transduction	K14487	-	GO:0003824//catalytic activity	GO:0009725//response to hormone;GO:0014070//response to organic cyclic compound
GWHGAAYT030612	3.56333	3.34834e-05	0.000468431	TRPA1	PREDICTED: tryptophan synthase alpha chain-like [Pyrus x bretschneideri]	Metabolism;Metabolism;Metabolism;Metabolism;Metabolism	Global and overview maps;Global and overview maps;Global and overview maps;Amino acid metabolism;Amino acid metabolism	ko01100//Metabolic pathways;ko01110//Biosynthesis of secondary metabolites;ko01230//Biosynthesis of amino acids;ko00260//Glycine, serine and threonine metabolism;ko00400//Phenylalanine, tyrosine and tryptophan biosynthesis	K01695;K01695;K01695;K01695;K01695	-	-	-
GWHGAAYT013766	3.55	1.56509e-08	4.30709e-07	ILL1	PREDICTED: IAA-amino acid hydrolase ILR1-like 4 [Pyrus x bretschneideri]	-	-	-	-	-	GO:0003824//catalytic activity	-
GWHGAAYT050722	3.29004	4.6847e-20	4.63421e-18	ARF5	PREDICTED: auxin response factor 5-like isoform X1 [Pyrus x bretschneideri]	Environmental Information Processing	Signal transduction	ko04075//Plant hormone signal transduction	K14486	GO:0043231//intracellular membrane-bounded organelle	GO:0000975//regulatory region DNA binding;GO:0001071//nucleic acid binding transcription factor activity;GO:0005515//protein binding	GO:0000578//embryonic axis specification;GO:0000904//cell morphogenesis involved in differentiation;GO:0006342//chromatin silencing;GO:0007015//actin filament organization;GO:0009755//hormone-mediated signaling pathway;GO:0009799//specification of symmetry;GO:0009887//organ morphogenesis;GO:0009933//meristem structural organization;GO:0009943//adaxial/abaxial axis specification;GO:0010051//xylem …
GWHGAAYT036649	3.07854	1.86169e-07	4.26543e-06	GH3.6	PREDICTED: indole-3-acetic acid-amido synthetase GH3.6-like [Pyrus x bretschneideri]	Environmental Information Processing	Signal transduction	ko04075//Plant hormone signal transduction	K14487	-	-	-
GWHGAAYT023143	2.83325	1.77412e-06	3.32148e-05	ILL6	PREDICTED: IAA-amino acid hydrolase ILR1-like 6 [Malus domestica]	-	-	-	-	-	GO:0003824//catalytic activity	-
GWHGAAYT052322	2.6845	1.11428e-18	1.01642e-16	ILL6	PREDICTED: IAA-amino acid hydrolase ILR1-like 6 [Malus domestica]	-	-	-	-	-	GO:0003824//catalytic activity	-
GWHGAAYT049651	2.5597	1.83792e-05	0.000272349	ASA1	PREDICTED: anthranilate synthase alpha subunit 1, chloroplastic [Pyrus x bretschneideri]	Metabolism;Metabolism;Metabolism;Metabolism	Global and overview maps;Global and overview maps;Global and overview maps;Amino acid metabolism	ko01100//Metabolic pathways;ko01110//Biosynthesis of secondary metabolites;ko01230//Biosynthesis of amino acids;ko00400//Phenylalanine, tyrosine and tryptophan biosynthesis	K01657;K01657;K01657;K01657	-	GO:0016833//oxo-acid-lyase activity	GO:0008152//metabolic process
GWHGAAYT023233	2.4057	2.04929e-12	9.47953e-11	ILL6	PREDICTED: IAA-amino acid hydrolase ILR1-like 6 [Malus domestica]	-	-	-	-	-	GO:0003824//catalytic activity	-
GWHGAAYT002634	2.1654	0.00395893	0.0274631	TAR4	PREDICTED: tryptophan aminotransferase-related protein 4-like [Pyrus x bretschneideri]	-	-	-	-	-	-	-
GWHGAAYT029820	2.16067	1.59269e-05	0.00023928	ILL4	PREDICTED: IAA-amino acid hydrolase ILR1-like 4 [Pyrus x bretschneideri]	-	-	-	-	-	GO:0003824//catalytic activity	-
GWHGAAYT051686	1.81599	0.000213951	0.00235603	IAA26	PREDICTED: auxin-responsive protein IAA2-like [Malus domestica]	Environmental Information Processing	Signal transduction	ko04075//Plant hormone signal transduction	K14484	-	-	-
GWHGAAYT019603	1.77069	0.00163089	0.0131939	ARF5	PREDICTED: auxin response factor 5 [Pyrus x bretschneideri]	Environmental Information Processing	Signal transduction	ko04075//Plant hormone signal transduction	K14486	GO:0043231//intracellular membrane-bounded organelle	GO:0005515//protein binding	GO:0009755//hormone-mediated signaling pathway;GO:0010468//regulation of gene expression;GO:0034645//cellular macromolecule biosynthetic process
GWHGAAYT002918	1.76118	6.40227e-06	0.000107368	SAUR41	PREDICTED: indole-3-acetic acid-induced protein ARG7-like [Pyrus x bretschneideri]	Environmental Information Processing	Signal transduction	ko04075//Plant hormone signal transduction	K14488	-	-	-
GWHGAAYT049655	1.68238	0.0030534	0.0221687	ASA1	PREDICTED: anthranilate synthase alpha subunit 1, chloroplastic [Pyrus x bretschneideri]	Metabolism;Metabolism;Metabolism;Metabolism	Global and overview maps;Global and overview maps;Global and overview maps;Amino acid metabolism	ko01100//Metabolic pathways;ko01110//Biosynthesis of secondary metabolites;ko01230//Biosynthesis of amino acids;ko00400//Phenylalanine, tyrosine and tryptophan biosynthesis	K01657;K01657;K01657;K01657	-	GO:0016833//oxo-acid-lyase activity	GO:0008152//metabolic process
GWHGAAYT041627	1.66443	2.89558e-07	6.39407e-06	GH3.1	PREDICTED: probable indole-3-acetic acid-amido synthetase GH3.1 [Pyrus x bretschneideri]	Environmental Information Processing	Signal transduction	ko04075//Plant hormone signal transduction	K14487	-	GO:0003824//catalytic activity	GO:0009725//response to hormone;GO:0014070//response to organic cyclic compound
GWHGAAYT055364	1.55258	1.90899e-06	3.54453e-05	IAA26	auxin-responsive protein IAA26-like [Malus domestica]	Environmental Information Processing	Signal transduction	ko04075//Plant hormone signal transduction	K14484	-	GO:0005515//protein binding	GO:0009755//hormone-mediated signaling pathway;GO:0010468//regulation of gene expression;GO:0034645//cellular macromolecule biosynthetic process
GWHGAAYT043890	1.31708	4.32134e-08	1.09838e-06	DRM1	auxin-repressed protein [Pyrus pyrifolia]	-	-	-	-	-	-	-
GWHGAAYT041811	1.26427	0.00553563	0.0362209	SAUR20	PREDICTED: auxin-induced protein 6B-like [Nelumbo nucifera]	Environmental Information Processing	Signal transduction	ko04075//Plant hormone signal transduction	K14488	-	-	-
GWHGAAYT029880	1.20686	1.69139e-08	4.62425e-07	IAA26	PREDICTED: auxin-responsive protein IAA26-like [Pyrus x bretschneideri]	Environmental Information Processing	Signal transduction	ko04075//Plant hormone signal transduction	K14484	-	GO:0005515//protein binding	GO:0009755//hormone-mediated signaling pathway;GO:0010468//regulation of gene expression;GO:0034645//cellular macromolecule biosynthetic process
GWHGAAYT031533	1.13799	0.00497833	0.0332809	IAA27	PREDICTED: auxin-responsive protein IAA27-like [Pyrus x bretschneideri]	Environmental Information Processing	Signal transduction	ko04075//Plant hormone signal transduction	K14484	-	GO:0005515//protein binding	GO:0009755//hormone-mediated signaling pathway;GO:0010468//regulation of gene expression;GO:0034645//cellular macromolecule biosynthetic process
GWHGAAYT020366	-1.03141	0.00553286	0.036219	YUC6	PREDICTED: indole-3-pyruvate monooxygenase YUCCA6-like [Pyrus x bretschneideri]	Metabolism;Metabolism	Global and overview maps;Amino acid metabolism	ko01100//Metabolic pathways;ko00380//Tryptophan metabolism	K11816;K11816	-	GO:0000166//nucleotide binding;GO:0016709//oxidoreductase activity, acting on paired donors, with incorporation or reduction of molecular oxygen, NAD(P)H as one donor, and incorporation of one atom of oxygen	GO:0044710//single-organism metabolic process
GWHGAAYT023448	-1.04057	9.13409e-05	0.00113329	ARF17	PREDICTED: auxin response factor 17-like [Pyrus x bretschneideri]	-	-	-	-	-	-	GO:0007275//multicellular organism development;GO:0009725//response to hormone;GO:0010467//gene expression;GO:0034645//cellular macromolecule biosynthetic process;GO:0048856//anatomical structure development;GO:0050794//regulation of cellular process
GWHGAAYT014974	-1.0453	9.37683e-06	0.000150281	AUX22B	PREDICTED: auxin-induced protein 22D [Pyrus x bretschneideri]	Environmental Information Processing	Signal transduction	ko04075//Plant hormone signal transduction	K14484	-	-	-
GWHGAAYT051789	-1.12574	0.00220719	0.0169407	YUC6	PREDICTED: indole-3-pyruvate monooxygenase YUCCA6-like [Malus domestica]	Metabolism;Metabolism	Global and overview maps;Amino acid metabolism	ko01100//Metabolic pathways;ko00380//Tryptophan metabolism	K11816;K11816	-	GO:0000166//nucleotide binding;GO:0016709//oxidoreductase activity, acting on paired donors, with incorporation or reduction of molecular oxygen, NAD(P)H as one donor, and incorporation of one atom of oxygen	GO:0044710//single-organism metabolic process
GWHGAAYT042954	-1.34249	5.43477e-22	6.34006e-20	AUX28	PREDICTED: auxin-induced protein AUX28-like [Pyrus x bretschneideri]	Environmental Information Processing	Signal transduction	ko04075//Plant hormone signal transduction	K14484	-	GO:0005515//protein binding	GO:0009755//hormone-mediated signaling pathway;GO:0010468//regulation of gene expression;GO:0034645//cellular macromolecule biosynthetic process
GWHGAAYT035246	-1.51052	1.24271e-05	0.000192122	ARF18	PREDICTED: auxin response factor 18 isoform X1 [Pyrus x bretschneideri]	-	-	-	-	GO:0043231//intracellular membrane-bounded organelle	GO:0001071//nucleic acid binding transcription factor activity;GO:0003723//RNA binding;GO:0005515//protein binding	GO:0009718//anthocyanin-containing compound biosynthetic process;GO:0009755//hormone-mediated signaling pathway;GO:0010468//regulation of gene expression;GO:0034645//cellular macromolecule biosynthetic process;GO:0040007//growth;GO:0048437//floral organ development;GO:0048827//phyllome development
GWHGAAYT026399	-1.52027	1.22107e-07	2.89508e-06	IAA14	PREDICTED: auxin-responsive protein IAA14-like [Malus domestica]	Environmental Information Processing	Signal transduction	ko04075//Plant hormone signal transduction	K14484	-	GO:0005515//protein binding	GO:0009755//hormone-mediated signaling pathway;GO:0010468//regulation of gene expression;GO:0034645//cellular macromolecule biosynthetic process
GWHGAAYT000889	-1.65929	9.13931e-10	3.05141e-08	SAUR32	PREDICTED: auxin-responsive protein SAUR32-like [Pyrus x bretschneideri]	Environmental Information Processing	Signal transduction	ko04075//Plant hormone signal transduction	K14488	-	-	-
GWHGAAYT004625	-2.02936	6.32747e-18	5.30873e-16	AUX28	PREDICTED: auxin-induced protein AUX28-like [Pyrus x bretschneideri]	Environmental Information Processing	Signal transduction	ko04075//Plant hormone signal transduction	K14484	-	GO:0005515//protein binding	GO:0009755//hormone-mediated signaling pathway;GO:0010468//regulation of gene expression;GO:0034645//cellular macromolecule biosynthetic process
GWHGAAYT054185	-2.35106	2.04415e-09	6.45682e-08	GH3.10	PREDICTED: jasmonic acid-amido synthetase JAR1 [Pyrus x bretschneideri]	Environmental Information Processing	Signal transduction	ko04075//Plant hormone signal transduction	K14487	-	-	GO:0001101//response to acid chemical;GO:0006970//response to osmotic stress
GWHGAAYT040969	-2.65783	0.00596755	0.0385645	ARG7	PREDICTED: auxin-induced protein 15A-like [Pyrus x bretschneideri]	Environmental Information Processing	Signal transduction	ko04075//Plant hormone signal transduction	K14488	-	-	-
GWHGAAYT004626	-2.6875	5.98866e-10	2.05573e-08	AUX22D	PREDICTED: auxin-induced protein 22D-like [Pyrus x bretschneideri]	Environmental Information Processing	Signal transduction	ko04075//Plant hormone signal transduction	K14484	-	GO:0005515//protein binding	GO:0009755//hormone-mediated signaling pathway;GO:0010468//regulation of gene expression;GO:0034645//cellular macromolecule biosynthetic process
GWHGAAYT049090	-3.41017	1.16491e-05	0.000181822	SAUR32	PREDICTED: auxin-responsive protein SAUR32-like [Pyrus x bretschneideri]	Environmental Information Processing	Signal transduction	ko04075//Plant hormone signal transduction	K14488	-	-	-
GWHGAAYT002887	-3.54314	0.00736261	0.0457231	ARG7	PREDICTED: auxin-induced protein 15A-like [Pyrus x bretschneideri]	Environmental Information Processing	Signal transduction	ko04075//Plant hormone signal transduction	K14488	-	-	-
GWHGAAYT003804	-3.7479	0.00258152	0.0193126	LAX2	PREDICTED: auxin transporter-like protein 2 [Pyrus x bretschneideri]	Environmental Information Processing	Signal transduction	ko04075//Plant hormone signal transduction	K13946	GO:0031224//intrinsic component of membrane	-	-
GWHGAAYT037343	-3.862	2.7661e-23	3.61581e-21	YUC10	PREDICTED: probable indole-3-pyruvate monooxygenase YUCCA10 [Malus domestica]	Metabolism;Metabolism	Global and overview maps;Amino acid metabolism	ko01100//Metabolic pathways;ko00380//Tryptophan metabolism	K11816;K11816	-	GO:0000166//nucleotide binding;GO:0016709//oxidoreductase activity, acting on paired donors, with incorporation or reduction of molecular oxygen, NAD(P)H as one donor, and incorporation of one atom of oxygen	GO:0009653//anatomical structure morphogenesis;GO:0009850//auxin metabolic process;GO:0044710//single-organism metabolic process
GWHGAAYT002911	-3.99816	1.37216e-14	8.1168e-13	ARG7	PREDICTED: indole-3-acetic acid-induced protein ARG7-like [Pyrus x bretschneideri]	Environmental Information Processing	Signal transduction	ko04075//Plant hormone signal transduction	K14488	-	-	-
GWHGAAYT002893	-10.37	0.000114417	0.00137272	ARG7	PREDICTED: auxin-responsive protein SAUR21-like [Pyrus x bretschneideri]	Environmental Information Processing	Signal transduction	ko04075//Plant hormone signal transduction	K14488	-	-	-
BR
GWHGAAYT046268	2.43376	0.000399183	0.00402219	CYP72A68	PREDICTED: cytochrome P450 CYP749A22-like [Pyrus x bretschneideri]	Metabolism	Metabolism of terpenoids and polyketides	ko00905//Brassinosteroid biosynthesis	K15639	-	-	-
GWHGAAYT049700	2.10506	0.00799688	0.0489151	CYP90A1	PREDICTED: cytochrome P450 90A1-like [Pyrus x bretschneideri]	Metabolism;Metabolism	Global and overview maps;Metabolism of terpenoids and polyketides	ko01110//Biosynthesis of secondary metabolites;ko00905//Brassinosteroid biosynthesis	K09588;K09588	GO:0031224//intrinsic component of membrane	GO:0016491//oxidoreductase activity;GO:0043169//cation binding;GO:0046906//tetrapyrrole binding	GO:0005976//polysaccharide metabolic process;GO:0009826//unidimensional cell growth;GO:0009909//regulation of flower development;GO:0010208//pollen wall assembly;GO:0016129//phytosteroid biosynthetic process;GO:0043479//pigment accumulation in tissues in response to UV light;GO:0048588//developmental cell growth;GO:0065008//regulation of biological quality
GWHGAAYT049680	1.71954	1.21424e-09	3.97254e-08	CYP90A1	PREDICTED: cytochrome P450 90A1-like [Pyrus x bretschneideri]	Metabolism;Metabolism	Global and overview maps;Metabolism of terpenoids and polyketides	ko01110//Biosynthesis of secondary metabolites;ko00905//Brassinosteroid biosynthesis	K09588;K09588	GO:0031224//intrinsic component of membrane	GO:0016491//oxidoreductase activity;GO:0043169//cation binding;GO:0046906//tetrapyrrole binding	GO:0005976//polysaccharide metabolic process;GO:0009826//unidimensional cell growth;GO:0009909//regulation of flower development;GO:0010208//pollen wall assembly;GO:0016129//phytosteroid biosynthetic process;GO:0043479//pigment accumulation in tissues in response to UV light;GO:0048588//developmental cell growth;GO:0065008//regulation of biological quality
GWHGAAYT021933	1.25342	0.00316028	0.0228315	CYP90B1	PREDICTED: cytochrome P450 90B1-like isoform X1 [Pyrus x bretschneideri]	Metabolism;Metabolism;Metabolism	Global and overview maps;Global and overview maps;Metabolism of terpenoids and polyketides	ko01100//Metabolic pathways;ko01110//Biosynthesis of secondary metabolites;ko00905//Brassinosteroid biosynthesis	K09587;K09587;K09587	-	-	-
GWHGAAYT013275	1.18759	0.000772773	0.00706229	CYP734A1	PREDICTED: cytochrome P450 CYP749A22-like [Pyrus x bretschneideri]	Metabolism	Metabolism of terpenoids and polyketides	ko00905//Brassinosteroid biosynthesis	K15639	-	-	-
GWHGAAYT054033	1.18157	0.00301789	0.0219565	BA13	PREDICTED: cytochrome P450 85A [Malus domestica]	Metabolism;Metabolism;Metabolism	Global and overview maps;Global and overview maps;Metabolism of terpenoids and polyketides	ko01100//Metabolic pathways;ko01110//Biosynthesis of secondary metabolites;ko00905//Brassinosteroid biosynthesis	K09590;K09590;K09590	-	GO:0016491//oxidoreductase activity;GO:0046906//tetrapyrrole binding;GO:0046914//transition metal ion binding	GO:0044710//single-organism metabolic process
CK
GWHGAAYT054154	2.77586	0.000569492	0.00546552	CYP735A2	PREDICTED: cytokinin hydroxylase-like [Pyrus x bretschneideri]	Metabolism;Metabolism;Metabolism	Global and overview maps;Global and overview maps;Metabolism of terpenoids and polyketides	ko01100//Metabolic pathways;ko01110//Biosynthesis of secondary metabolites;ko00908//Zeatin biosynthesis	K10717;K10717;K10717	-	GO:0016634//oxidoreductase activity, acting on the CH-CH group of donors, oxygen as acceptor;GO:0046906//tetrapyrrole binding;GO:0046914//transition metal ion binding	GO:0044710//single-organism metabolic process
GWHGAAYT050714	2.75999	6.33723e-05	0.000817842	LOGL2	PREDICTED: cytokinin riboside 5'-monophosphate phosphoribohydrolase LOG1-like [Malus domestica]	-	-	-	-	GO:0044444//cytoplasmic part	GO:0016798//hydrolase activity, acting on glycosyl bonds	GO:0000041//transition metal ion transport;GO:0001101//response to acid chemical;GO:0009267//cellular response to starvation;GO:0009690//cytokinin metabolic process;GO:0009725//response to hormone;GO:0015698//inorganic anion transport
GWHGAAYT025205	2.57549	6.67449e-06	0.000111296	ARR4	PREDICTED: two-component response regulator ARR5 [Malus domestica]	Environmental Information Processing	Signal transduction	ko04075//Plant hormone signal transduction	K14492	-	-	-
GWHGAAYT019971	2.16717	3.3805e-05	0.000471803	LOG8	PREDICTED: cytokinin riboside 5'-monophosphate phosphoribohydrolase LOG8-like isoform X1 [Pyrus x bretschneideri]	-	-	-	-	-	-	-
GWHGAAYT019960	2.09084	0.00019079	0.00214388	LOG8	PREDICTED: cytokinin riboside 5'-monophosphate phosphoribohydrolase LOG8-like isoform X1 [Pyrus x bretschneideri]	-	-	-	-	-	-	-
GWHGAAYT014096	1.02694	3.63119e-07	7.84686e-06	AHK3	PREDICTED: histidine kinase 3-like [Pyrus x bretschneideri]	Environmental Information Processing	Signal transduction	ko04075//Plant hormone signal transduction	K14489	GO:0031224//intrinsic component of membrane;GO:0044464//cell part	GO:0004672//protein kinase activity;GO:0004888//transmembrane signaling receptor activity;GO:0019901//protein kinase binding;GO:0032550//purine ribonucleoside binding	GO:0000160//phosphorelay signal transduction system;GO:0000302//response to reactive oxygen species;GO:0006468//protein phosphorylation;GO:0006625//protein targeting to peroxisome;GO:0009062//fatty acid catabolic process;GO:0009267//cellular response to starvation;GO:0009409//response to cold;GO:0009617//response to bacterium;GO:0009737//response to abscisic acid;GO:0009744//response to sucrose;G…
GWHGAAYT009651	-1.03693	0.00232266	0.0176374	AHP1	histidine-containing phosphotransfer 3a [Malus domestica]	Environmental Information Processing	Signal transduction	ko04075//Plant hormone signal transduction	K14490	-	GO:0060089//molecular transducer activity	-
GWHGAAYT024552	-1.15847	0.00102426	0.00891013	AHK4	PREDICTED: histidine kinase 4 [Pyrus x bretschneideri]	Environmental Information Processing	Signal transduction	ko04075//Plant hormone signal transduction	K14489	GO:0031224//intrinsic component of membrane;GO:0043231//intracellular membrane-bounded organelle	GO:0009784//transmembrane receptor histidine kinase activity;GO:0016791//phosphatase activity;GO:0019901//protein kinase binding;GO:0032550//purine ribonucleoside binding	GO:0006468//protein phosphorylation;GO:0009267//cellular response to starvation;GO:0009617//response to bacterium;GO:0009744//response to sucrose;GO:0009746//response to hexose;GO:0009755//hormone-mediated signaling pathway;GO:0009845//seed germination;GO:0010015//root morphogenesis;GO:0010468//regulation of gene expression;GO:0015698//inorganic anion transport;GO:0035556//intracellular signal tr…
GWHGAAYT040020	-1.3859	1.87122e-09	5.95557e-08	AHP1	PREDICTED: histidine-containing phosphotransfer protein 1-like [Pyrus x bretschneideri]	Environmental Information Processing	Signal transduction	ko04075//Plant hormone signal transduction	K14490	-	GO:0016628//oxidoreductase activity, acting on the CH-CH group of donors, NAD or NADP as acceptor;GO:0060089//molecular transducer activity	GO:0044710//single-organism metabolic process
GWHGAAYT028948	-1.40555	2.80321e-08	7.40801e-07	AHK2	PREDICTED: histidine kinase 2 [Malus domestica]	Environmental Information Processing	Signal transduction	ko04075//Plant hormone signal transduction	K14489	GO:0031224//intrinsic component of membrane	GO:0004672//protein kinase activity;GO:0004888//transmembrane signaling receptor activity;GO:0019901//protein kinase binding;GO:0032550//purine ribonucleoside binding	GO:0006468//protein phosphorylation;GO:0009409//response to cold;GO:0009737//response to abscisic acid;GO:0009755//hormone-mediated signaling pathway;GO:0009845//seed germination;GO:0010468//regulation of gene expression;GO:0034756//regulation of iron ion transport;GO:0035556//intracellular signal transduction;GO:0048507//meristem development;GO:0048580//regulation of post-embryonic development;G…
GWHGAAYT037271	-1.67429	0.00402326	0.0278104	IPT3	adenylate isopentenyltransferase 3, chloroplastic [Malus domestica]	Metabolism;Metabolism;Metabolism	Global and overview maps;Global and overview maps;Metabolism of terpenoids and polyketides	ko01100//Metabolic pathways;ko01110//Biosynthesis of secondary metabolites;ko00908//Zeatin biosynthesis	K10760;K10760;K10760	GO:0009536//plastid;GO:0031090//organelle membrane	GO:0016765//transferase activity, transferring alkyl or aryl (other than methyl) groups;GO:0032550//purine ribonucleoside binding	GO:0006399//tRNA metabolic process;GO:0009690//cytokinin metabolic process;GO:0022402//cell cycle process
GA
GWHGAAYT004640	3.53102	2.06999e-20	2.1119e-18	GA2OX1	GA2-oxidase [Pyrus communis]	Metabolism;Metabolism	Global and overview maps;Metabolism of terpenoids and polyketides	ko01110//Biosynthesis of secondary metabolites;ko00904//Diterpenoid biosynthesis	K04125;K04125	-	-	-
GWHGAAYT042968	2.40921	1.24497e-05	0.000192369	GA2OX1	PREDICTED: gibberellin 2-beta-dioxygenase 1-like isoform X1 [Pyrus x bretschneideri]	Metabolism;Metabolism	Global and overview maps;Metabolism of terpenoids and polyketides	ko01110//Biosynthesis of secondary metabolites;ko00904//Diterpenoid biosynthesis	K04125;K04125	-	-	-
GWHGAAYT037320	2.03092	9.60912e-34	2.42556e-31	GID1B	gibberellin receptor [Pyrus pyrifolia]	Environmental Information Processing	Signal transduction	ko04075//Plant hormone signal transduction	K14493	-	-	-
GWHGAAYT025810	1.93572	0.000317584	0.00330344	GA2OX2	PREDICTED: gibberellin 2-beta-dioxygenase 2-like [Malus domestica]	Metabolism;Metabolism	Global and overview maps;Metabolism of terpenoids and polyketides	ko01110//Biosynthesis of secondary metabolites;ko00904//Diterpenoid biosynthesis	K04125;K04125	-	GO:0043169//cation binding;GO:0045543//gibberellin 2-beta-dioxygenase activity	GO:0009685//gibberellin metabolic process;GO:0051553//flavone biosynthetic process
GWHGAAYT039770	1.23219	0.00392916	0.0273083	PIL15	PREDICTED: transcription factor PIF3-like isoform X2 [Pyrus x bretschneideri]	Environmental Information Processing;Organismal Systems	Signal transduction;Environmental adaptation	ko04075//Plant hormone signal transduction;ko04712//Circadian rhythm - plant	K12126;K12126	-	-	-
GWHGAAYT021175	-1.0858	7.16231e-09	2.07215e-07	GAI1	DELLA protein GAI-like [Malus domestica]	Environmental Information Processing	Signal transduction	ko04075//Plant hormone signal transduction	K14494	GO:0043231//intracellular membrane-bounded organelle	-	GO:0010468//regulation of gene expression;GO:0034645//cellular macromolecule biosynthetic process
GWHGAAYT012172	-1.46635	5.45406e-13	2.68856e-11	PIL15	PREDICTED: transcription factor PIF3-like isoform X1 [Pyrus x bretschneideri]	Environmental Information Processing;Organismal Systems	Signal transduction;Environmental adaptation	ko04075//Plant hormone signal transduction;ko04712//Circadian rhythm - plant	K12126;K12126	-	-	-
GWHGAAYT030777	-2.56647	7.89879e-23	9.92637e-21	GAI	PREDICTED: DELLA protein GAI-like [Pyrus x bretschneideri]	Environmental Information Processing	Signal transduction	ko04075//Plant hormone signal transduction	K14494	-	-	-
